# Supplementary material for: Ecological Risk Assessment of Amoxicillin, Enrofloxacin, and Neomycin: Are Their Current Levels in the Freshwater Environment Safe?
Source: MDPI journal article supplement (doi:10.3390/toxics9080196), 2021-08-23
Supplement: s1 [file s1]

# Ecological Risk Assessment of Amoxicillin, Enrofloxacin, and Neomycin: Are their Current Levels in the Freshwater Environment Safe?

Sangwoo Lee, Cheolmin Kim, Xiaoshan Liu, Saeram Lee, Young-Lim Kho, Woo-Keun Kim, Philje Kim and Kyungho Choi

## Supplementary Materials and Methods

### Analytical determination of test compounds

The actual concentrations of the test compounds in the exposure media were measured between water renewals using high performance liquid chromatography (HPLC Series 1100, Agilent Technologies, Santa Clara, CA, USA) with triple quadrupole mass spectrometry (MS/MS). Operating conditions for analysis were as follows: injection volume 5  $\mu$ L, flow rate 200  $\mu$ L/min, model ESI positive gas temperature 400  $^{\circ}$ C, and capillary voltage 5500 V. The averages of measured concentrations, e.g., before and after the water renewal, were used for presentation of the results and statistical analysis, because some concentrations were not maintained within 20% of differences from the nominal concentration. Measured concentrations for exposure media were summarized in Supplement Table S2.

**Table S1.** Physicochemical characteristics of tested veterinary pharmaceuticals.

|                    | Amoxicillin                                                                         | Enrofloxacin                                                                         | Neomycin sulfate (neomycin)                                                           |
|--------------------|-------------------------------------------------------------------------------------|--------------------------------------------------------------------------------------|---------------------------------------------------------------------------------------|
| Structure          | 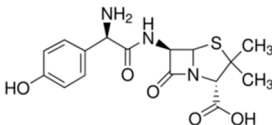 |  |  |
| Type               | B-lactam antibiotic                                                                 | Fluoroquinolone antibiotic                                                           | Aminoglycoside antibiotic                                                             |
| CAS RN.            | 26787-78-0                                                                          | 93106-60-6                                                                           | 1405-10-3 (1404-04-2)                                                                 |
| Molecular weight   | 365.4                                                                               | 359.4                                                                                | 908.9 (614.6)                                                                         |
| LogK <sub>ow</sub> | 0.87                                                                                | 0.7                                                                                  | (-9.41)                                                                               |
| pK <sub>a</sub>    | 9.48                                                                                | 7.7                                                                                  | (13.19)                                                                               |

**Table S2.** Nominal and measured concentrations of the control and treatments that were used for amoxicillin, enrofloxacin, and neomycin exposure.

| Pharmaceutical | Type of medium                 | LOD (µg/L) | Nominal concentration (mg/L) | Measured concentration <sup>a</sup> (mg/L) |
|----------------|--------------------------------|------------|------------------------------|--------------------------------------------|
| Amoxicillin    | M4                             | 7.6        | 0                            | ND                                         |
|                |                                |            | 3.70                         | 2.05                                       |
|                |                                |            | 11.1                         | 10.2                                       |
|                |                                |            | 33.3                         | 27.2                                       |
|                |                                |            | 100                          | 161                                        |
|                |                                |            | 300                          | 266                                        |
|                |                                |            |                              |                                            |
|                | Conditioned Water <sup>b</sup> | 7.6        | 0                            | ND                                         |
|                |                                |            | 1.23                         | 1.37                                       |
|                |                                |            | 3.70                         | 2.54                                       |
|                |                                |            | 11.1                         | 8.21                                       |
|                |                                |            | 33.3                         | 21.8                                       |
|                |                                |            | 100                          | 38.9                                       |
|                |                                |            |                              |                                            |
| Enrofloxacin   | M4                             | 0.2        | 0                            | ND                                         |
|                |                                |            | 0.247                        | 0.106                                      |
|                |                                |            | 0.741                        | 0.279                                      |
|                |                                |            | 2.22                         | 0.880                                      |
|                |                                |            | 6.67                         | 2.47                                       |
|                |                                |            | 20.0                         | 6.70                                       |
|                |                                |            |                              |                                            |
|                | Conditioned Water <sup>b</sup> | 0.2        | 0                            | ND                                         |
|                |                                |            | 0.005                        | 0.0066                                     |
|                |                                |            | 0.05                         | 0.043                                      |
|                |                                |            | 0.5                          | 0.41                                       |
|                |                                |            | 5.0                          | 3.2                                        |
|                |                                |            | 50                           | 11                                         |
|                |                                |            |                              |                                            |
| Neomycin       | M4                             | 12.4       | 0                            | ND                                         |
|                |                                |            | 0.062                        | 0.011                                      |
|                |                                |            | 0.19                         | 0.028                                      |
|                |                                |            | 0.56                         | 0.15                                       |
|                |                                |            | 1.7                          | 1.5                                        |
|                |                                |            | 5.0                          | 5.3                                        |
|                |                                |            |                              |                                            |
|                | Conditioned Water <sup>b</sup> | 12.4       | 0                            | ND                                         |
|                |                                |            | 0.01                         | 0.0044                                     |
|                |                                |            | 0.1                          | 0.053                                      |
|                |                                |            | 1.0                          | 0.87                                       |
|                |                                |            | 10                           | 11                                         |
|                |                                |            | 100                          | 127                                        |
|                |                                |            |                              |                                            |

ND: Not detected. <sup>a</sup> Average concentration of those measured at the beginning of and after 48 h exposure. <sup>b</sup> The medium for fish (*O. latipes*) toxicity test.

**Table S3.** Toxicity values obtained from acute and chronic test of *D. magna* and *M. macrocopa* after acute or chronic exposure to tested pharmaceuticals.

| Pharmaceuticals     | Acute EC <sub>50</sub> (95% CI) |                      | Chronic NOEC <sup>a</sup> |                     | ACR (this study) <sup>b</sup> |                     |
|---------------------|---------------------------------|----------------------|---------------------------|---------------------|-------------------------------|---------------------|
|                     | <i>D. magna</i>                 | <i>M. macrocopa</i>  | <i>D. magna</i>           | <i>M. macrocopa</i> | <i>D. magna</i>               | <i>M. macrocopa</i> |
| <b>Amoxicillin</b>  | >1000                           | >1000                | 27.2                      | 2.05 <sup>c</sup>   | >36.8                         | >487.8              |
| <b>Enrofloxacin</b> | 20.1<br>(16.8-23.4)             | 85.2<br>(70.4-100.1) | 0.12 <sup>c</sup>         | 2.47                | 167.8                         | 34.5                |
| <b>Neomycin</b>     | 56.0<br>(39.3-72.8)             | 22.9<br>(17.0-28.7)  | 0.15                      | >5.3                | 373.5                         | NA                  |

Unit in mg/L, EC<sub>50</sub>: median effective concentration, CI: confidence interval, NOEC: no observed effect concentration, ACR: acute to chronic ratio, NA: not available. <sup>a</sup>The lowest value among the NOECs for survival, reproduction, or growth following 21 d exposure. <sup>b</sup>ACR was calculated from acute EC<sub>50</sub>/chronic NOEC of this study. <sup>c</sup>NOEC determined based on positive response, i.e., increase in number of neonates per female.
